# Supplementary material for: Fractal pattern mediated superhydrophobic glass and metallic surfaces using PTFE particles: a generalized simple approach
Source: Royal Society of Chemistry journal article supplement (doi:10.1039/c9nj00620f), 2019-01-01
Supplement: c9nj00620f1.pdf [file c9nj00620f1.pdf]

# Fractal Pattern Mediated Superhydrophobic Glass and Metallic Surfaces using PTFE Particles: A Generalized Simple Approach

## (Supporting Information)

Nainsi Saxena, Santanu Paria\*

Interfaces and Nanomaterials Laboratory, Department of Chemical Engineering, National Institute of Technology, Rourkela 769008, Orissa, India.

\*Corresponding author. E-mail addresses: sparia@nitrkl.ac.in, or. santanuparia@yahoo.com;

Fax: +91 661 246 2999

### Coating of Different wt % on Glass Surface before Heating (Single coating)

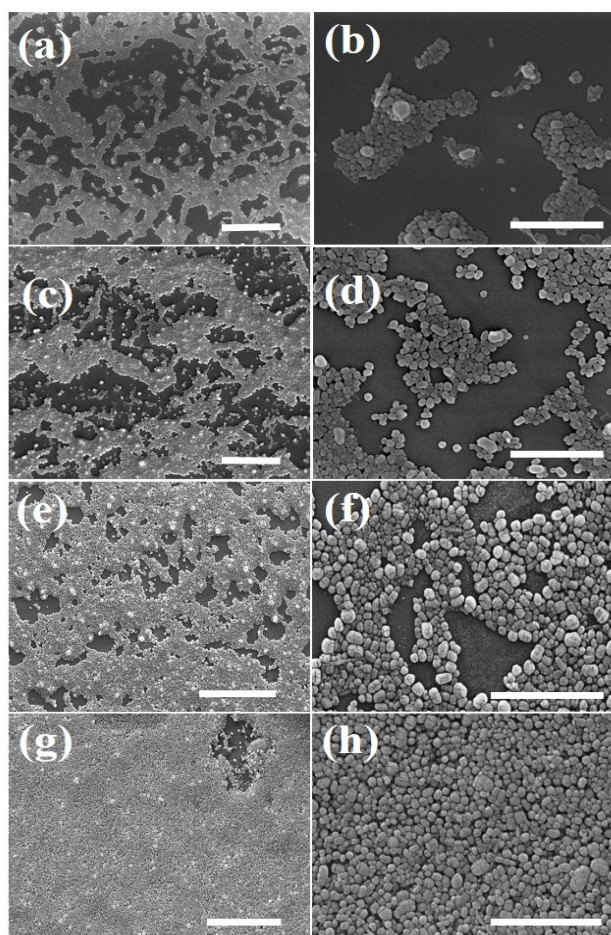

**Figure S1:** FE-SEM images of the coated glass surface with different wt% of PTFE before heating (a, b) 2 wt%, (c, d) 3wt%, (e, f) 4 wt%, (g, h) 5 wt%. Scale bar (a, c, e, g) = 10  $\mu\text{m}$  and (b, d, f, h) = 3  $\mu\text{m}$ .

**Coating of Different wt % on Glass Surface after Heating at 250 °C for 2 hrs (single coating)**

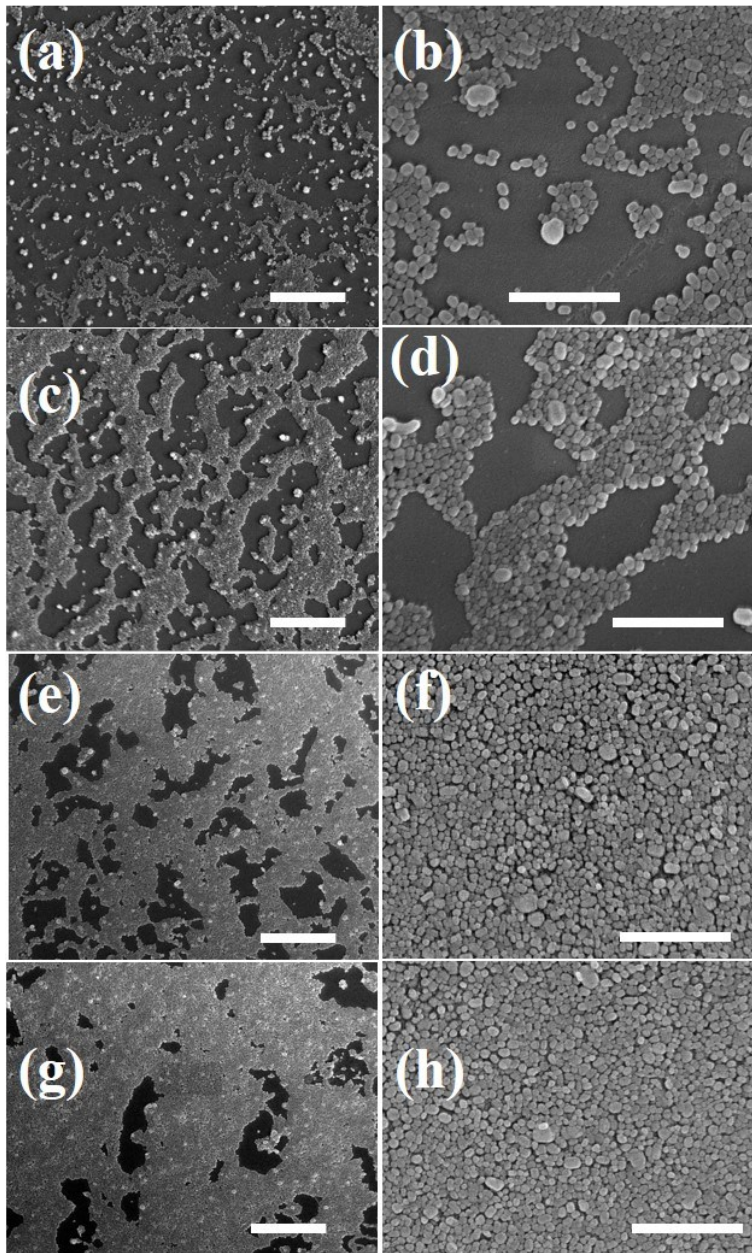

**Figure S2:** FE-SEM images of the coated glass surface with different wt% of PTFE after heating at 250 °C for 2 hrs (a, b) 2 wt%, (c, d) 3wt%, (e, f) 4 wt%, (g, h) 5 wt%. Scale bar (a, c, e, g) = 10 μm and (b, d, f, h) = 3 μm.

## Droplet Evaporation Study

A 10  $\mu\text{l}$  droplet of same 5 wt% of PTFE dispersion was dropped and kept for drying at 40  $^{\circ}\text{C}$  inside a dry block heater for 1 hr. It was found when the droplet containing 5 wt% was showing an empty area, and the NPs were unable to give a uniform deposition after drying as shown in figure S3(a). A similar observation was found for 5 wt% after 3 times coating on the same droplet shown in figure S3 (b). Later we have done the multiple coating with successively heating after each coating at 250  $^{\circ}\text{C}$  for 2 hrs and analyzed microscopically. The results figure S3(c, f) shows that when the coatings were increased up to 5 times on the same droplet, the whole droplet area was covered by PTFE NPs with a uniform coating. We have also used 60 wt% PTFE suspension for droplet evaporation and found that at higher concentration the droplet was giving non-uniform coating and showing big lumps after evaporation along with the crack formation figure S3 (h, i).

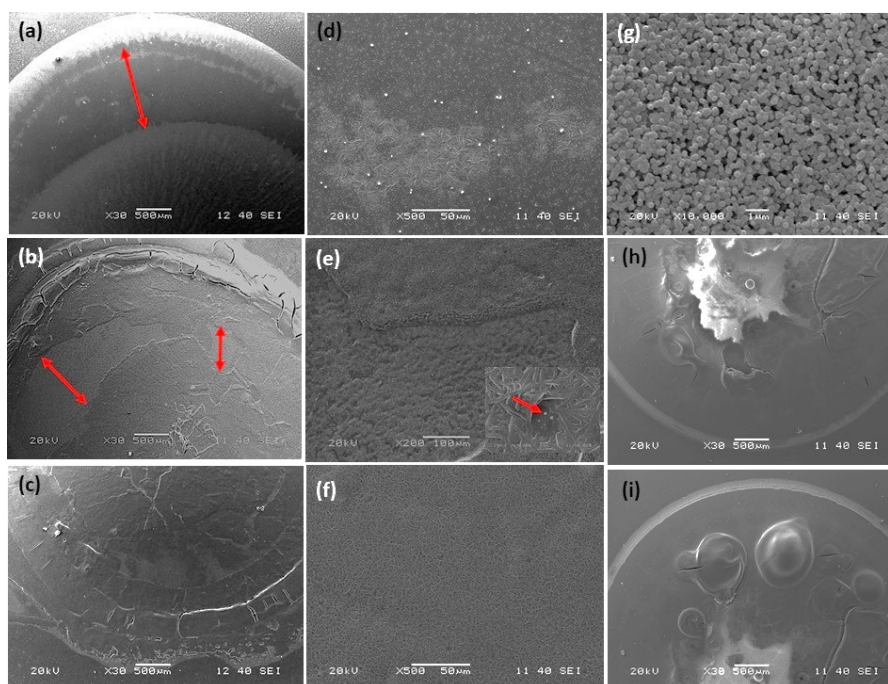

**Figure S3:** Droplet evaporation study with various wt% of PTFE dispersion (a,d) 5 wt%, after single coating, (b,e) 5 wt%, after triple coating, (c,f) 5 wt%, after 5 coating, (g) magnified view

of PTFE NPs 5 wt% drop after drying. (h,i) droplet evaporation of 60 wt% PTFE suspension showing cracked and lumps formation.

### **FT-IR spectroscopy**

To see the effect of sintering temperature on PTFE coating, FT-IR analysis of PTFE coated surfaces before and after sintering (250 °C) were done and presented in figure S4. The peak at 1656  $\text{cm}^{-1}$  for PTFE coating before curing is due to the presence of moisture signifies H-O-H scissors-bending<sup>1</sup>, and that at 3400  $\text{cm}^{-1}$  is for H-O-H stretching. These peaks were observed when the coating was dried at 25 °C, however absent at 80 °C because of removal of water molecules. The characteristic peaks at 1210 and 1148  $\text{cm}^{-1}$  are correspond to  $-\text{CF}_2-$  asymmetric and symmetric stretching, which are consistent for all samples.<sup>2-4</sup> From the spectra, it is clear the PTFE layer remains intact after sintering at 250°C temperature and water removes at ~ 80 °C.

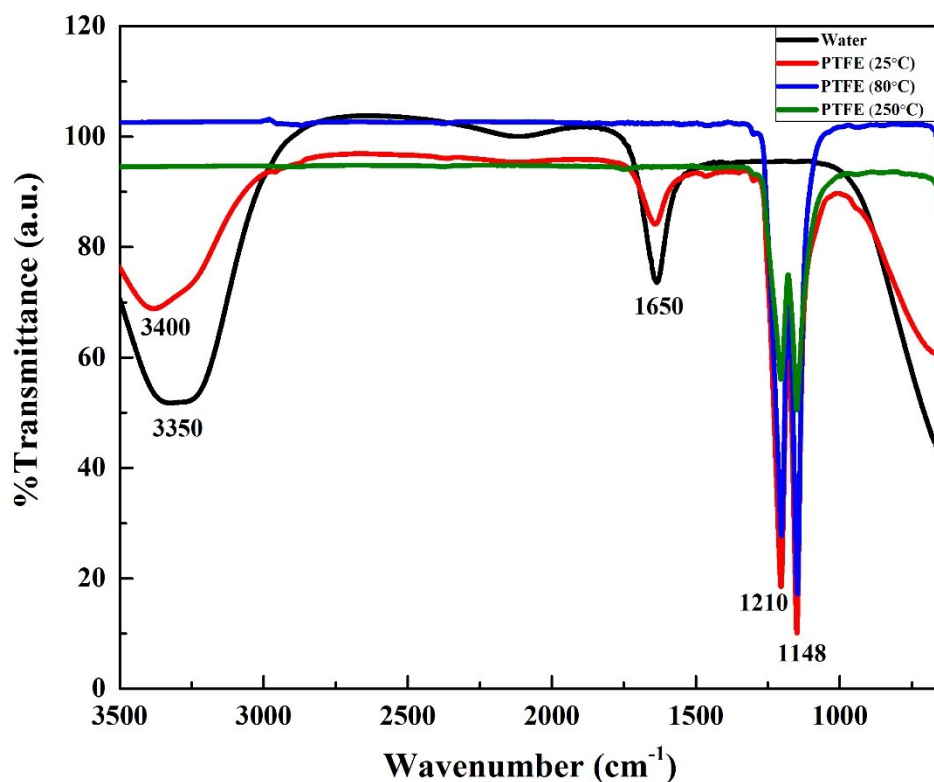

**Figure S4:** FT-IR spectra of pure water and PTFE coatings dried at 25°C, 80 °C, and sintered at 250°C for 2 h.

**Table-ST1:** Water contact angle on 2,3,4 and 5 wt% PTFE dispersion coated glass surfaces with respective number of coatings at curing temperature 250 °C.

| Number of coatings | Contact angle |             |            |            |
|--------------------|---------------|-------------|------------|------------|
|                    | 2%            | 3%          | 4%         | 5%         |
| 1                  | 127.5±9       | 129.1±8.5   | 130.2±9.2  | 133.5±3.78 |
| 2                  | 128.2±4.5     | 130.5±5     | 131.4±5    | 134.5±3    |
| 3                  | 133.18±3.1    | 137.6±1.7   | 138±1.4    | 138±0.80   |
| 4                  | 137.7±0.9     | 137.25±0.69 | 139.1±1    | 139.3±0.69 |
| 5                  | 137.9±0.72    | 137.4±0.58  | 138.3±0.69 | 139±0.35   |

**Table ST2:** Average roughness of coated samples measured by profilometer are given below after single coating.

| <b>The single coating on glass surface (PTFE wt%)</b> | <b>Before heating (nm)</b> | <b>After heating at 250 °C (nm)</b> |
|-------------------------------------------------------|----------------------------|-------------------------------------|
| Blank                                                 | 15                         | -                                   |
| 2 wt%                                                 | 85                         | 118                                 |
| 3 wt%                                                 | 112                        | 142                                 |
| 4 wt%                                                 | 138                        | 190                                 |
| 5 wt%                                                 | 180                        | 220                                 |
| Patterns (5 wt %)                                     | 266                        | 378                                 |

### **EDS analysis**

The eds spectra of a small area of fabricated fractal patterns on glass surface analyzed and given below.

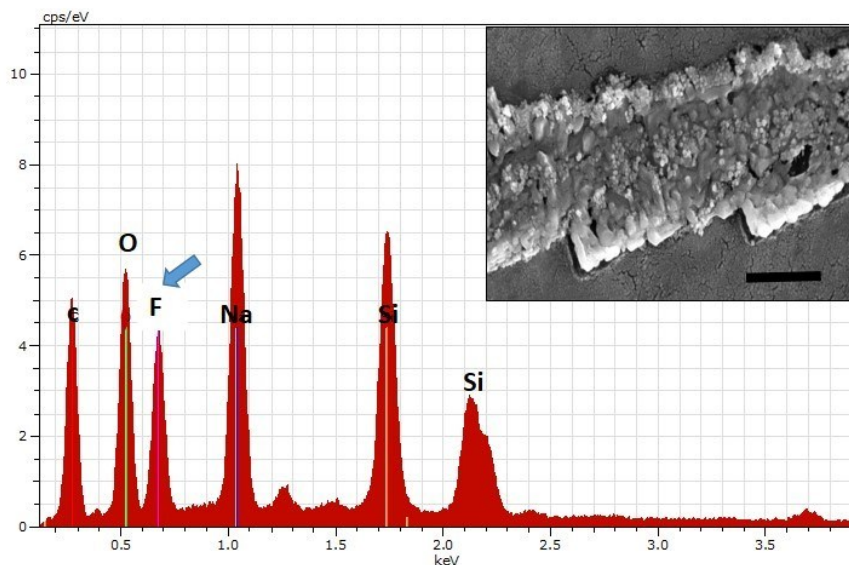

| El     | AN     | Series   | unn. C | norm. C | Atom. C | Error (1 Sigma) |
|--------|--------|----------|--------|---------|---------|-----------------|
| [wt.%] | [wt.%] | [wt.%]   | [at.%] | [wt.%]  | [wt.%]  |                 |
| C      | 6      | K-series | 14.27  | 29.03   | 40.82   | 1.94            |
| O      | 8      | K-series | 10.79  | 21.95   | 23.17   | 1.43            |
| F      | 9      | K-series | 7.68   | 15.62   | 13.89   | 1.06            |
| Na     | 11     | K-series | 7.56   | 15.37   | 11.29   | 0.48            |
| Si     | 14     | K-series | 8.86   | 18.02   | 10.83   | 0.39            |
| Total: |        |          | 49.15  | 100.00  | 100.00  |                 |

**Figure S5: EDS analysis patterns, inset view of the selected area elemental analysis.**

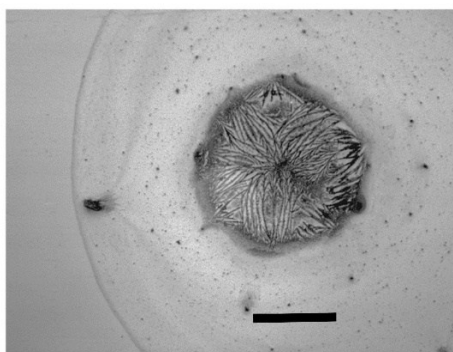

**Figure S6.** Optical microscopic image of the formed pattern after droplet evaporation of CMCNa and oxalic acid (D). Scale bar 500  $\mu\text{m}$ . Patterns formed under the influence of the ICRD effect.

### Effect of CMCNa Concentration on Pattern Formation

We performed an experiment to study the effect of CMCNa on the fractal pattern formation with PTFE NPs mixture with D (CMCNa and oxalic acid). Herein, we took an increased CMCNa concentration from 0.4 to 0.6 wt% remaining things we kept same like other experiments. The FE-SEM (figure S7) shows that branched patterns are mostly vanished and organized into strips like patterns along with PTFE NPs.

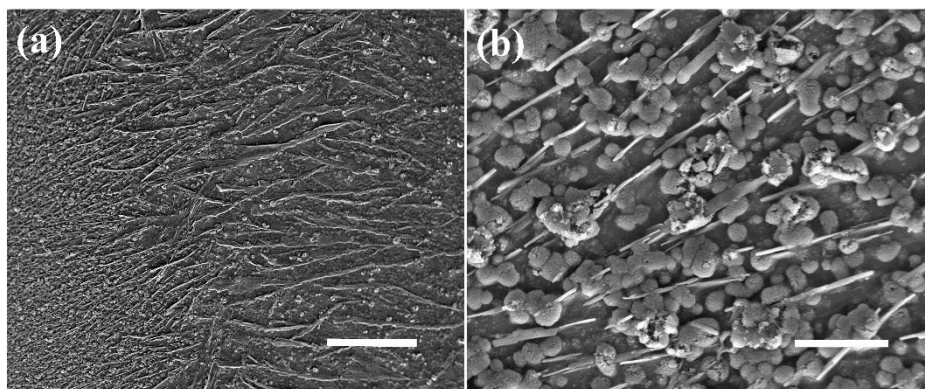

**Figure S7:** Organized PTFE NPs using 0.6 wt% of CMCNa and 40 mM oxalic acid. Scale bar 100  $\mu\text{m}$  and 10  $\mu\text{m}$ .

#### References:

- (1) Mojet, B. L.; Ebbesen, S. D.; Lefferts, L. *Chem. Soc. Rev.* **2010**, *39* (12), 4643–4655.
- (2) Chen, X.; Gong, Y.; Suo, X.; Huang, J.; Liu, Y.; Li, H. *Appl. Surf. Sci.* **2015**, *356*, 639–644.
- (3) Gupta, P.; Kandasubramanian, B. *ACS Appl. Mater. Interfaces* **2017**, *9*, 19102–19113.
- (4) Lappan, U.; Geißler, U.; Lunkwitz, K. *J. Appl. Polym.* **1999**, *74*, 1571–1576.
